# Supplementary material
Source: PubMed Central journal article supplement (PMC3908544)

**ASSOCIATION BETWEEN MATERNAL USE OF FOLIC ACID SUPPLEMENTS  
AND RISK OF AUTISM IN CHILDREN**

**ONLINE SUPPLEMENT**

**eTable 1. ASD Cases by Year of Birth**

| Cohort        |               | ASD        |               | Autistic Disorder |               | Asperger's Syndrome |               | PDD-NOS    |               |
|---------------|---------------|------------|---------------|-------------------|---------------|---------------------|---------------|------------|---------------|
| Year of Birth | n             | n          | %             | n                 | %             | n                   | %             | n          | %             |
| 2002          | 7,377         | 49         | 0.66 %        | 19                | 0.26 %        | 15                  | 0.20 %        | 15         | 0.20 %        |
| 2003          | 10,858        | 72         | 0.66 %        | 26                | 0.24 %        | 24                  | 0.22 %        | 22         | 0.20 %        |
| 2004          | 11,882        | 42         | 0.35 %        | 13                | 0.11 %        | 9                   | 0.08 %        | 20         | 0.17 %        |
| 2005          | 13,711        | 40         | 0.29 %        | 16                | 0.12 %        | 5                   | 0.04 %        | 19         | 0.14 %        |
| 2006          | 15,364        | 31         | 0.20 %        | 14                | 0.09 %        | 2                   | 0.01 %        | 15         | 0.10 %        |
| 2007          | 14,140        | 19         | 0.13 %        | 12                | 0.08 %        | 1                   | 0.01 %        | 6          | 0.04 %        |
| 2008          | 11,844        | 17         | 0.14 %        | 14                | 0.12 %        | 0                   | 0.00 %        | 3          | 0.03 %        |
| <b>Total</b>  | <b>85,176</b> | <b>270</b> | <b>0.32 %</b> | <b>114</b>        | <b>0.13 %</b> | <b>56</b>           | <b>0.07 %</b> | <b>100</b> | <b>0.12 %</b> |

Includes ASD cases identified in the study sample (n=85,176: 43,759 boys and 41,417 girls) by March 31<sup>st</sup>, 2012. Of the 270 ASD cases, 135 (50%) have participated in the clinical assessments of the ABC study: 63 (55%) of autistic disorder cases, 16 (29%) of Asperger's syndrome cases, and 56 (56%) of PDD-NOS cases. For those who have not participated, diagnoses were derived from the Norwegian Patient Registry.

**eTable 2. Parent and Child Characteristics by Maternal Fish Oil Use**

|                                   | Fish Oil Use Week (-4) to 8      |        |                           |        |                               |        |
|-----------------------------------|----------------------------------|--------|---------------------------|--------|-------------------------------|--------|
|                                   | Total Study Sample<br>(n=85,176) |        | No Fish Oil<br>(n=46,314) |        | Use of Fish Oil<br>(n=38,862) |        |
|                                   | n                                | %      | n                         | %      | n                             | %      |
| <b>Maternal education, y</b>      |                                  |        |                           |        |                               |        |
| < 12                              | 6,264                            | 7.4 %  | 4,580                     | 9.9 %  | 1,684                         | 4.3 %  |
| 12                                | 22,616                           | 26.6 % | 14,364                    | 31.0 % | 8,252                         | 21.2 % |
| 13 - 16                           | 34,641                           | 40.7 % | 17,819                    | 38.5 % | 16,822                        | 43.3 % |
| >= 17                             | 19,910                           | 23.4 % | 8,520                     | 18.4 % | 11,390                        | 29.3 % |
| Missing data                      | 1,745                            | 2.0 %  | 1,031                     | 2.2 %  | 714                           | 1.8 %  |
| <b>Paternal education, y</b>      |                                  |        |                           |        |                               |        |
| < 12                              | 9,067                            | 10.6 % | 6,079                     | 13.1 % | 2,988                         | 7.7 %  |
| 12                                | 32,161                           | 37.8 % | 19,216                    | 41.5 % | 12,945                        | 33.3 % |
| 13 - 16                           | 22,476                           | 26.4 % | 11,121                    | 24.0 % | 11,355                        | 29.2 % |
| >= 17                             | 18,835                           | 22.1 % | 8,307                     | 17.9 % | 10,528                        | 27.1 % |
| Missing data                      | 2,637                            | 3.1 %  | 1,591                     | 3.4 %  | 1,046                         | 2.7 %  |
| <b>Maternal age, y</b>            |                                  |        |                           |        |                               |        |
| < 25                              | 9,384                            | 11.0 % | 6,220                     | 13.4 % | 3,164                         | 8.1 %  |
| 25 - 29                           | 28,107                           | 33.0 % | 15,305                    | 33.0 % | 12,802                        | 32.9 % |
| 30 - 34                           | 32,975                           | 38.7 % | 17,134                    | 37.0 % | 15,841                        | 40.8 % |
| >= 35                             | 14,710                           | 17.3 % | 7,655                     | 16.5 % | 7,055                         | 18.2 % |
| <b>Paternal age, y</b>            |                                  |        |                           |        |                               |        |
| < 25                              | 4,041                            | 4.7 %  | 2,734                     | 5.9 %  | 1,307                         | 3.4 %  |
| 25 - 29                           | 19,167                           | 22.5 % | 10,650                    | 23.0 % | 8,517                         | 21.9 % |
| 30 - 34                           | 33,101                           | 38.9 % | 17,446                    | 37.7 % | 15,655                        | 40.3 % |
| 35 - 39                           | 20,231                           | 23.8 % | 10,749                    | 23.2 % | 9,482                         | 24.4 % |
| >= 40                             | 8,411                            | 9.9 %  | 4,608                     | 9.9 %  | 3,803                         | 9.8 %  |
| Missing data                      | 225                              | 0.3 %  | 127                       | 0.3 %  | 98                            | 0.3 %  |
| <b>Planned pregnancy</b>          |                                  |        |                           |        |                               |        |
| Yes                               | 68,094                           | 79.9 % | 35,966                    | 77.7 % | 32,128                        | 82.7 % |
| No                                | 16,061                           | 18.9 % | 9,737                     | 21.0 % | 6,324                         | 16.3 % |
| Missing data                      | 1,021                            | 1.2 %  | 611                       | 1.3 %  | 410                           | 1.1 %  |
| <b>Maternal smoking</b>           |                                  |        |                           |        |                               |        |
| No                                | 77,845                           | 91.4 % | 41,140                    | 88.8 % | 36,705                        | 94.4 % |
| Yes                               | 6,740                            | 7.9 %  | 4,798                     | 10.4 % | 1,942                         | 5.0 %  |
| Missing data                      | 591                              | 0.7 %  | 376                       | 0.8 %  | 215                           | 0.6 %  |
| <b>Maternal pre-pregnancy BMI</b> |                                  |        |                           |        |                               |        |
| < 25                              | 56,614                           | 66.5 % | 29,241                    | 63.1 % | 27,373                        | 70.4 % |
| 25 - 29                           | 18,332                           | 21.5 % | 10,633                    | 23.0 % | 7,699                         | 19.8 % |
| 30 - 34                           | 5,830                            | 6.8 %  | 3,639                     | 7.9 %  | 2,191                         | 5.6 %  |
| >= 35                             | 2,158                            | 2.5 %  | 1,403                     | 3.0 %  | 755                           | 1.9 %  |
| Missing data                      | 2,242                            | 2.6 %  | 1,398                     | 3.0 %  | 844                           | 2.2 %  |
| <b>Parity</b>                     |                                  |        |                           |        |                               |        |
| 0                                 | 37,946                           | 44.6 % | 18,948                    | 40.9 % | 18,998                        | 48.9 % |
| 1                                 | 30,674                           | 36.0 % | 17,000                    | 36.7 % | 13,674                        | 35.2 % |
| >= 2                              | 16,556                           | 19.4 % | 10,366                    | 22.4 % | 6,190                         | 15.9 % |

**eTable 2 continued**

|                      | Fish Oil Use Week (-4) to 8      |          |                           |        |                               |        |
|----------------------|----------------------------------|----------|---------------------------|--------|-------------------------------|--------|
|                      | Total Study Sample<br>(n=85,176) |          | No Fish Oil<br>(n=46,314) |        | Use of Fish Oil<br>(n=38,862) |        |
|                      | n                                | Column % | n                         | Row %  | n                             | Row %  |
| <b>Year of birth</b> |                                  |          |                           |        |                               |        |
| 2002                 | 7,377                            | 8.7 %    | 5,706                     | 77.3 % | 1,671                         | 22.7 % |
| 2003                 | 10,858                           | 12.7 %   | 7,389                     | 68.1 % | 3,469                         | 31.9 % |
| 2004                 | 11,882                           | 13.9 %   | 6,954                     | 58.5 % | 4,928                         | 41.5 % |
| 2005                 | 13,711                           | 16.1 %   | 7,600                     | 55.4 % | 6,111                         | 44.6 % |
| 2006                 | 15,364                           | 18.0 %   | 7,339                     | 47.8 % | 8,025                         | 52.2 % |
| 2007                 | 14,140                           | 16.6 %   | 6,326                     | 44.7 % | 7,814                         | 55.3 % |
| 2008                 | 11,844                           | 13.9 %   | 5,000                     | 42.2 % | 6,844                         | 57.8 % |

<sup>a</sup> p<0.001 for all variables, 2-sided chi-square test for independence.

<sup>b</sup> Maternal smoking, daily or occasionally, during pregnancy.

<sup>c</sup> Parity including previous miscarriage or abortion after week 22 of gestation.

**eFigure 1. Fish Oil Supplement Use by Pregnancy Interval**

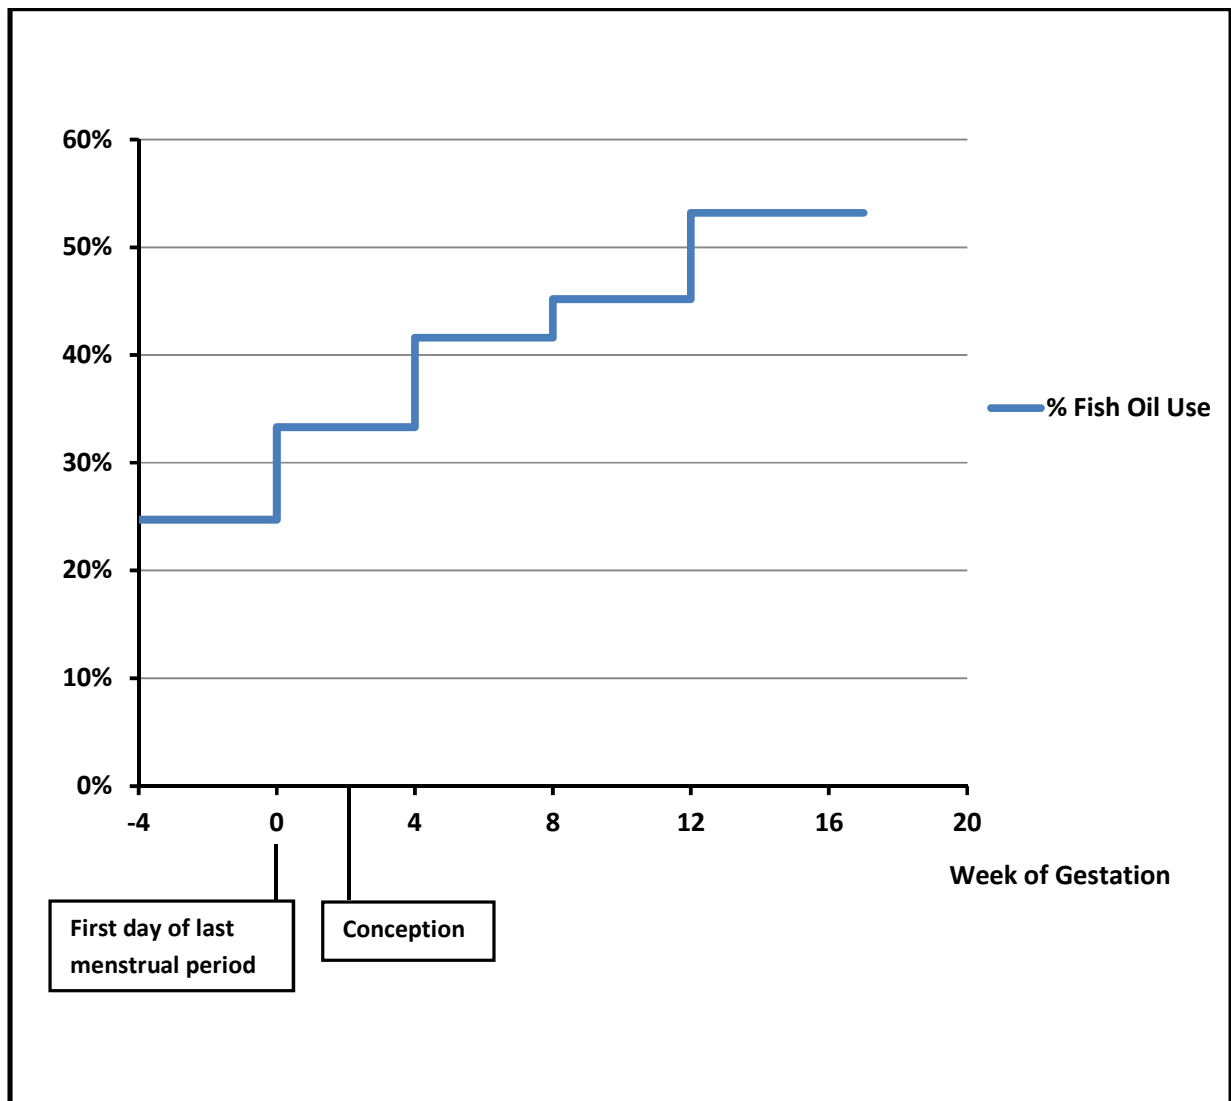

Supplement: NIHMS526835-supplement-Online_Supplement.pdf [file NIHMS526835-supplement-Online_Supplement.pdf]
